# Supplementary material for: Urinary metabolomics analysis based on LC-MS for the diagnosis and monitoring of acute coronary syndrome
Source: Front Mol Biosci. 2025 Apr 9;12:1547476. doi: 10.3389/fmolb.2025.1547476 (PMC12014464; doi:10.3389/fmolb.2025.1547476)
Supplement: Supplementary file 3 [file Table1.xlsx]

## Sheet: Sheet1
Sheet 1:Mfuzz correlation analysis of urinary metabolites among ACS subgroups. Metabolites in cluster 4 (n= 73) and 5(n= 87) were increased with ACS progression; Proteins in cluster 2(n= 94) and 6(n= 163) were decreased with ACS progression
Nmes	Clusters	Mean of control	Mean of UA	Mean of AMI
TROMETHAMINE	1	-0.828269	0.532993	0.467648
Saccharopine	1	-0.966534	0.635871	0.489279
Triethylamine	1	-0.908553	0.575565	0.549876
3-Methyl-cis,cis-hexadienedioate	1	-0.832628	0.441526	0.852741
6-[4-(carboxymethyl)-3,5-dihydroxy-2-(3-methylbut-2-en-1-yl)phenoxy]-3,4,5-trihydroxyoxane-2-carboxylic acid	1	-0.819274	0.510893	0.528774
2-Amino-4-oxo-6-(1',2',3'-trihydroxypropyl)-diquinoid-7,8-dihydroxypterin	1	-0.83365	0.528726	0.502059
Epinephrine glucuronide	1	-0.981417	0.534664	0.947334
Matrine	1	-0.842225	0.555587	0.420276
(2R,2'R)-3,3'-disulfanediylbis(2-acetamidopropanoic acid)	1	-0.803266	0.488776	0.567695
Diclobutrazol	1	-0.571552	0.246299	0.815832
(S)-alpha-Amino-4-carboxy-3-furanpropanoic acid	1	-0.898158	0.575151	0.518536
6-[5-(2-{[2-(3,4-dimethoxyphenyl)ethyl]-C-hydroxycarbonimidoyl}ethyl)-2-methoxyphenoxy]-3,4,5-trihydroxyoxane-2-carboxylic acid	1	-1.00835	0.582497	0.838751
Lincomycin	1	-0.81795	0.50451	0.550476
Gln Ala Pro Leu	1	-0.850396	0.527454	0.560414
Armillaridin	1	-0.888404	0.550104	0.589215
Asn Ala Arg Arg	1	-0.77157	0.473362	0.529577
Biotin-NHS	1	-0.557675	0.266337	0.690423
3,4,5-trihydroxy-6-[(2-{9-[(3-methylbut-2-enoyl)oxy]-2-oxo-2H,8H,9H-furo[2,3-h]chromen-8-yl}propan-2-yl)oxy]oxane-2-carboxylic acid	1	-0.956627	0.550794	0.803121
Macrophorin C	1	-0.866133	0.460398	0.882572
1,2-Naphthoquinone	1	-0.830297	0.483905	0.673326
Genistein 4',7-O-diglucuronide	1	-0.94452	0.568711	0.691944
Pitheduloside A	1	-0.883803	0.533142	0.643445
Phe Leu Ala Tyr	1	-0.872747	0.554955	0.519793
5,7-dihydroxy-2-(4-hydroxy-3-methoxyphenyl)-8-(3,4,5-trihydroxyoxan-2-yl)-4H-chromen-4-one	1	-0.58293	0.269778	0.756676
1-Octen-3-yl primeveroside	1	-0.911822	0.567326	0.593699
3,4,5-trihydroxy-6-{3-[(1E)-3-hydroxybut-1-en-1-yl]phenoxy}oxane-2-carboxylic acid	1	-0.705391	0.430858	0.491874
Tranilast	1	-0.904803	0.500159	0.844024
Dihydrozeatin-O-glucoside	1	-0.880511	0.545465	0.582974
Ramiprilat diketopiperazine	1	-0.826767	0.517064	0.527531
3,4,5-trihydroxy-6-{[2-(4-hydroxyphenyl)-8-methoxy-4-oxo-3,4-dihydro-2H-1-benzopyran-7-yl]oxy}oxane-2-carboxylic acid	1	-1.08644	0.685072	0.670452
(6-carboxy-3,4,5-trihydroxyoxan-2-yl)[2-(3,4-dihydroxyphenyl)-3,5-dihydroxy-7H-chromen-7-ylidene]oxidanium	1	-1.19149	0.733656	0.806941
5,6-dihydroxy-2-[hydroxy(3,4,5-trihydroxyoxan-2-yl)methyl]-4-[(2E)-3-(4-hydroxyphenyl)prop-2-enoyl]-6-[3,4,5-trihydroxy-6-(hydroxymethyl)oxan-2-yl]cyclohex-4-ene-1,3-dione	1	-0.783518	0.442092	0.694449
3-(3,4-dihydroxyphenyl)-N-(3-oxopropyl)propanimidic acid	1	-0.852447	0.557026	0.446903
4-Hydroxyandrostenedione glucuronide	1	-0.867772	0.578123	0.409953
gamma-L-Glutamyl-L-methionine sulfoxide	1	-0.803001	0.546957	0.330705
3,4,5-trihydroxy-6-{[1-(4-methoxyphenyl)-4-methyl-3-oxopentyl]oxy}oxane-2-carboxylic acid	1	-1.12349	0.709484	0.689074
Cys Thr Ser	2	0.0849429	0.0578346	-0.504559
2-Diethylaminoethanol	2	0.147341	0.0304749	-0.591718
Histamine	2	0.212734	-0.0139279	-0.619213
Deoxycytidine	2	0.291414	-0.0613543	-0.676642
6-{[3-(2,4-dihydroxyphenyl)propanoyl]oxy}-3,4,5-trihydroxyoxane-2-carboxylic acid	2	0.246143	-0.063045	-0.525977
2-Methylbenzaldehyde	2	0.234849	0.0109571	-0.790463
L-Threoneopterin	2	0.0440626	0.135887	-0.691505
Arginyl-Proline	2	0.12321	0.0482515	-0.587218
Conhydrine	2	0.293629	-0.0774312	-0.618423
TMPD (hydrochloride)	2	0.166944	0.043439	-0.706605
Isoleucylproline	2	0.17705	0.020029	-0.643687
6-Aminocaproic acid	2	0.378708	-0.141888	-0.627054
Desethylchloroquine	2	0.337946	-0.0831811	-0.735859
5-hydroxypropafenone	2	0.367411	0.263776	-2.23769
Styrene	2	0.0738552	0.0878104	-0.591006
Pyridine N-oxide glucuronide	2	0.250207	-0.0178631	-0.722273
6-Hydroxymelatonin	2	0.32728	-0.0673087	-0.766402
3,4,5-trihydroxy-6-{[4-hydroxy-5-(3-methoxyphenyl)pentanoyl]oxy}oxane-2-carboxylic acid	2	0.266039	-0.0437794	-0.667371
Lidocaine	2	0.34791	0.29301	-2.2944
2,6-Dioxo-6-phenylhexanoate	2	0.20803	-0.0102245	-0.619303
L-prolyl-L-proline	2	0.255617	-0.0324471	-0.680262
3-Indoleacetic Acid	2	0.262009	-0.0212056	-0.746193
beta-Ionone	2	0.446101	-0.145933	-0.824711
N-Jasmonoylisoleucine	2	-0.0297077	0.168993	-0.591549
Cinnamyl isobutyrate	2	0.198413	0.0997337	-1.03505
Petasitenine	2	0.0730038	0.0782153	-0.549357
(+)-cis-5,6-Dihydro-5-hydroxy-4-methoxy-6-(2-phenylethyl)-2H-pyran-2-one	2	0.121767	0.111656	-0.839981
alpha-Zearalenol	2	0.0332868	0.152634	-0.725249
CITROPTEN	2	0.193766	0.309928	-1.87343
Gravacridonediol	2	0.221092	0.0250024	-0.803773
(8alpha,10beta,11beta)-3-Hydroxy-4,15-dinor-1(5)-xanthen-12,8-olide	2	0.209527	0.0408639	-0.831415
a-[1-(diethylamino)ethyl]-p-hydroxy-Benzyl alcohol	2	0.0904287	0.0624404	-0.540679
3-hydroxy-3-(3,4,5-trimethoxyphenyl)propanoic acid	2	0.213387	0.0785523	-0.996646
2-Phenylethanol glucuronide	2	0.183511	0.0634795	-0.84057
Glycodeoxycholic Acid	2	0.270583	0.296409	-2.06257
2,6-Dimethylnaphthalene	2	-0.00591473	0.17302	-0.683468
Polyethylene, oxidized	2	0.286319	0.00821903	-0.942843
3,4,5-trihydroxy-6-{[8-(2-hydroxypropan-2-yl)-2-oxo-4-propyl-2H,8H,9H-furo[2,3-h]chromen-5-yl]oxy}oxane-2-carboxylic acid	2	0.385792	-0.119186	-0.7417
6-{[3-(5,7-dihydroxy-2,2-dimethyl-3,4-dihydro-2H-1-benzopyran-6-yl)-4-oxo-4H-chromen-7-yl]oxy}-3,4,5-trihydroxyoxane-2-carboxylic acid	2	0.330364	0.200532	-1.86332
Dhelwangin	2	0.11953	0.057609	-0.613507
Vanilpyruvic acid	2	0.29722	0.0266032	-1.05209
3,4,5-trihydroxy-6-{[5-(4-methoxyphenyl)-3-oxopentyl]oxy}oxane-2-carboxylic acid	2	0.289828	-0.0772646	-0.607028
Benzyl b-L-arabinopyranoside	2	0.33649	-0.0587687	-0.830319
6-{3,5-dihydroxy-2-[3-(3,4,5-trimethoxyphenyl)propanoyl]phenoxy}-3,4,5-trihydroxyoxane-2-carboxylic acid	2	0.16057	-0.00240673	-0.500279
m-Coumaric acid	2	0.334517	-0.0364072	-0.914814
1'-Acetoxyeugenol acetate	2	0.345305	-0.0231981	-1.00269
3-Hydroxynevirapine glucuronide	2	0.336682	-0.0820083	-0.736602
Byssochlamic acid	2	0.356926	-0.109916	-0.687634
Zedoarondiol	2	0.266111	-0.0213388	-0.758683
Dihydroactinidiolide	2	0.2717	-0.0409287	-0.696923
Limonene-1,2-epoxide	2	0.252149	-0.0619557	-0.549476
MYCOPHENOLIC ACID	2	0.170231	0.0382292	-0.695899
2-Hydroxyacorenone	2	0.195561	0.0494761	-0.822008
Asp Gln Gly	2	0.195506	0.0141032	-0.678261
2-hydroxydesipramine	2	0.109312	0.0935987	-0.727129
Achillicin	2	0.194978	-0.0037539	-0.604105
alpha-curcumene	2	0.358491	-0.0900611	-0.773195
Dehydrovomifoliol	2	0.319785	-0.0788064	-0.695926
6-{[3,7-dihydroxy-2-(3-methoxyphenyl)-8aH-chromen-5-yl]oxy}-3,4,5-trihydroxyoxane-2-carboxylic acid	2	0.216146	0.314625	-1.96359
Schidigeragenin B	2	0.0478186	0.12428	-0.656326
Citalopram	2	0.130808	0.0535285	-0.632771
Armillane	2	0.0977994	0.0783883	-0.628821
6'-Hydroxy-O-desmethylangolensin	2	0.477009	-0.187923	-0.752461
AMP-Deoxynojirimycin	2	0.136057	0.00424962	-0.449429
7,8-Dehydro-beta-micropteroxanthin	2	0.253996	0.339403	-2.18439
Confertifoline	2	0.183838	0.0635449	-0.841874
Artemin	2	0.210813	-0.00699447	-0.641251
3,7-Dimethyl-2E,6-octadienyl acetate	2	0.321932	-0.0777582	-0.707002
3-alpha-Androstanediol glucuronide	2	0.682611	-0.297691	-0.960017
Curdione	2	0.148102	0.0249172	-0.571575
Germacrenone	2	0.0540853	0.0993684	-0.575119
Codeine-6-glucuronide	2	0.309801	0.278204	-2.11325
Maprotiline	2	0.0175897	0.139462	-0.621927
Prostaglandin D3	2	0.20145	0.0233734	-0.734767
4,8 Dimethylnonanoyl carnitine	2	0.363962	-0.0981666	-0.757675
Oxaprozin	2	-0.0632756	0.227939	-0.72417
Bakkenolide C	2	0.295667	-0.0906347	-0.571308
9Z-Dodecen-7-ynyl acetate	2	0.160533	0.158333	-1.15257
3,4,5-trihydroxy-6-{3-hydroxy-5-[(E)-2-(4-hydroxyphenyl)ethenyl]-2-[(1E)-3-methylbut-1-en-1-yl]phenoxy}oxane-2-carboxylic acid	2	0.0726763	0.105735	-0.660013
4-Hydroxy-D4-neuroprostane	2	0.305204	-0.0878451	-0.612924
Isoavocadienofuran	2	0.187363	0.364375	-2.07409
Procurcumadiol	2	0.402113	-0.0674282	-1.00362
13,14-dehydro-15-cyclohexyl Carbaprostacyclin	2	0.0397297	0.110493	-0.574671
Alprostadil	2	0.446432	-0.169576	-0.729799
Isoeugenitin	2	0.310512	0.276782	-2.10974
4-Oxo-9-cis-retinoyl-beta-glucuronide	2	0.35752	-0.0761833	-0.826437
12-Oxo-2,3-dinor-10,15-phytodienoic acid	2	0.38408	-0.0746813	-0.9169
Sterebin E	2	0.157106	0.0474721	-0.691723
Lucidenic acid L	2	0.189669	0.013491	-0.657236
4-Hydroxy-3-methoxy-2,10-bisaboladien-9-one	2	0.305105	0.0592009	-1.20944
Estriol-16-Glucuronide	2	0.155594	0.0182877	-0.568465
15-Hydroxynorandrostene-3,17-dione glucuronide	2	0.276848	0.0181926	-0.953238
Gentian Violet	2	0.739693	-0.338309	-0.976476
Idebenone Metabolite (QS-8)	2	0.154604	0.03128	-0.618054
Pro Asp His	3	-0.292022	0.29175	-0.25656
Val Ser Gln	3	-0.186334	0.265459	-0.485566
N-Acetyl-L-glutamic acid	3	-0.461212	0.413191	-0.212043
L-Nicotine	3	0.0307373	0.055655	-0.32353
Asp Gly Pro	3	-0.398006	0.346139	-0.140665
Asp Asn Val	3	-0.359669	0.308765	-0.110744
gamma-Glutamyl-S-methylcysteine	3	-0.155419	0.13427	-0.0512933
Asp Gly Val	3	-0.32067	0.337862	-0.352721
3,4,5-trihydroxy-6-(3,4,5-trihydroxycyclohex-1-ene-1-carbonyloxy)oxane-2-carboxylic acid	3	-0.274193	0.257729	-0.17511
Tyramine-O-sulfate	3	-0.387735	0.358216	-0.222307
Blepharin	3	-0.220125	0.200707	-0.115414
Hydroxyprolyl-Lysine	3	-0.202843	0.173863	-0.0613568
Val Asn Val	3	-0.203409	0.205624	-0.188469
Robenidine	3	-0.16642	0.209607	-0.32213
Nuttalline	3	-0.281444	0.30692	-0.351735
Glutamylmethionine	3	-0.192256	0.252951	-0.415988
Blennin D	3	-0.3488	0.295819	-0.0927225
D-Glucurono-6,3-lactone	3	-0.277605	0.250386	-0.134469
Val His Ile	3	-0.25675	0.30439	-0.419908
3b,8b-Dihydroxy-6b-(3-chloro-2-hydroxy-2-methylbutanoyloxy)-7(11)-eremophilen-12,8-olide	3	-0.18575	0.206148	-0.246688
3-O-Acetylepisamarcandin	3	-0.215965	0.257197	-0.35791
7alpha-hydroxy-3-oxochol-4-en-24-oic Acid	3	-0.253806	0.35143	-0.620186
Palmitoylglycerone phosphate	3	-0.252505	0.285592	-0.357096
Rutarin	3	-0.932293	0.836542	-0.433975
2-Phenylethyl beta-D-glucopyranoside	3	-0.243091	0.254613	-0.261258
7-Hydroxy-6-methyl-8-ribityl lumazine	3	-0.311498	0.266023	-0.0902757
3,4,5-trihydroxy-6-{[(6E)-3-oxo-1,7-diphenylhepta-4,6-dien-1-yl]oxy}oxane-2-carboxylic acid	3	-0.281564	0.268509	-0.195452
DIMBOA-Glc	3	-0.242341	0.212628	-0.0932325
Tryptophyl-Glycine	3	-0.137157	0.144571	-0.15111
p-Mentha-1,3,5,8-tetraene	3	0.0833711	0.0318877	-0.394253
6-{[1-(2-{[3-(3,4-dimethoxyphenyl)-1-hydroxyprop-2-en-1-ylidene]amino}ethyl)-3-methoxy-4-oxocyclohexa-2,5-dien-1-yl]oxy}-3,4,5-trihydroxyoxane-2-carboxylic acid	3	-0.420092	0.334438	-0.0230122
Rhazidigenine Nb-oxide	3	-0.333424	0.350775	-0.364622
2-amino-4-({1-[(carboxymethyl)-C-hydroxycarbonimidoyl]-2-{[1-hydroxy-1-(4-hydroxy-3-methoxyphenyl)-3-oxobutan-2-yl]sulfanyl}ethyl}-C-hydroxycarbonimidoyl)butanoic acid	3	-0.916372	0.812885	-0.388528
11,13-Dihydrotaraxinic acid glucosyl ester	3	-0.50992	0.629454	-0.935097
L-Tetrahydropalmatine	3	-0.14722	0.179126	-0.2594
3,4,5-trihydroxy-6-[1-(4-methoxyphenyl)-3-phenylpropoxy]oxane-2-carboxylic acid	3	-0.355641	0.29654	-0.0739199
Estrone glucuronide	3	-0.217787	0.325601	-0.629761
2-Hydroxy-3-O-methylnaltrexone	3	-0.260392	0.262767	-0.239395
Ginkgolide J	3	-0.315924	0.309452	-0.252485
7-Oxo-11-dodecenoic acid	3	-0.375784	0.363808	-0.282963
Lucidenic acid F	3	-0.282265	0.24494	-0.0975604
NSC 210902	3	-0.0981136	0.181616	-0.425494
Ala Ile Leu	3	-0.333289	0.336839	-0.308488
Cortolone-3-glucuronide	3	-0.262961	0.263609	-0.234653
5-(3',5'-Dihydroxyphenyl)-gamma-valerolactone-O-glucuronide-O-methyl	3	-0.178867	0.246575	-0.432638
2-(4-Allyl-2-methoxyphenoxy)-1-(4-hydroxy-3-methoxyphenyl)-1-propanol	3	-0.314683	0.328519	-0.333821
18R-HEPE	3	-0.250196	0.227841	-0.130026
Isokobusone	3	-0.412499	0.408744	-0.348732
Ethyl 7-epi-12-hydroxyjasmonate glucoside	3	-0.532651	0.435209	-0.0744861
Porson	3	-0.312294	0.26727	-0.0928077
Glycocholic acid	3	-0.251985	0.224271	-0.109854
9-HOTE	3	-0.318251	0.382992	-0.543583
SCLAREOLIDE	3	-0.41454	0.420196	-0.388727
16-Hydroxy-10-oxohexadecanoic acid	3	-0.382108	0.370975	-0.291966
Janthitrem B	3	-0.203804	0.168393	-0.0361017
MG(22:4(7Z,10Z,13Z,16Z)/0:0/0:0)	3	-0.359453	0.316312	-0.142061
7-HYDROXY-8,4'-DIMETHOXYISOFLAVONE	3	-0.181883	0.192286	-0.20271
6-Dehydrotestosterone glucuronide	3	-0.309289	0.267613	-0.103749
3,4,5-trihydroxy-6-[(5-oxo-1,7-diphenylheptan-2-yl)oxy]oxane-2-carboxylic acid	3	-0.13188	0.253181	-0.608706
meglumine	4	-0.340609	0.227625	0.158046
N1,N12-Diacetylspermine	4	-0.312918	0.172549	0.293629
Sucrose	4	-0.355046	0.231997	0.186158
S-Adenosylmethionine	4	-0.513771	0.373136	0.117487
Maltotriose	4	-0.337713	0.206223	0.235715
1-(3-Carboxypropyl)-3,7-dimethylxanthine	4	-0.250375	0.0840411	0.454201
3'-Ketolactose	4	-0.393882	0.210861	0.395306
Deoxyfructosazine	4	-0.448549	0.292027	0.239515
6-{[(3,4,5-trihydroxy-6-methyloxan-2-yl)oxy]methyl}oxane-2,3,4,5-tetrol	4	-0.305037	0.141781	0.393479
4-(Glutamylamino) butanoate	4	-0.445633	0.286841	0.251302
N-Acetyldjenkolic acid	4	-0.271029	0.190439	0.087957
1-Anilino-9,10-dioxo-2-anthroic acid	4	-0.328563	0.196662	0.245452
Ile Ser Ser	4	-0.312325	0.215008	0.119413
Asp Val	4	-0.646594	0.488923	0.0694339
Asp Met	4	-0.514398	0.392442	0.0411172
Leu Ser Gln	4	-0.397094	0.293901	0.0684655
Ser Asp Val	4	-0.386179	0.30393	-0.00690973
Asp Asp Val	4	-0.504284	0.373607	0.0854385
Asp Ile Lys	4	-0.469776	0.317989	0.201567
Prostaglandin E2	4	-0.484864	0.336286	0.175232
6-(4-ethenyl-3-hydroxyphenoxy)-3,4,5-trihydroxyoxane-2-carboxylic acid	4	-0.375828	0.282649	0.046582
5-Hydroxyindoleacetic acid	4	-0.324641	0.16044	0.380014
Arginyl-Gamma-glutamate	4	-0.504089	0.375041	0.078999
Gln Leu	4	-0.254262	0.142161	0.230648
3,4,5-trihydroxy-6-({2-hydroxy-3-[4-hydroxy-3-(3-methylbut-2-en-1-yl)phenyl]propanoyl}oxy)oxane-2-carboxylic acid	4	-0.375401	0.249078	0.181485
4-Hydroxyphenylacetylglutamic acid	4	-0.253724	0.171465	0.109999
2-hydroxy-3-[4-hydroxy-3-(4-hydroxy-3-methylbut-2-en-1-yl)phenyl]propanoic acid	4	-0.317741	0.187838	0.246892
alpha-Hydroxymetoprolol	4	-0.445088	0.244914	0.419747
6-[4-(2-{[3-(3,4-dimethoxyphenyl)-1-hydroxypropylidene]amino}ethyl)-2-methoxyphenoxy]-3,4,5-trihydroxyoxane-2-carboxylic acid	4	-0.354094	0.265229	0.0482507
N-Feruloylglycyl-L-phenylalanine	4	-0.379182	0.265574	0.126541
Levofloxacin	4	-0.374608	0.281526	0.0472661
Phe Ser Ile	4	-0.260982	0.170457	0.137146
Hyoscyamine	4	-0.271577	0.175988	0.148351
Cyclocalamin	4	-0.461798	0.341003	0.0828189
3,8,13,15-tetrahydroxy-16,17-dimethoxytricyclo[12.3.1.1虏,鈦禲nonadeca-1(18),2,4,6(19),14,16-hexaen-9-one	4	-0.365593	0.24633	0.161486
Thr Leu Phe	4	-0.18754	-0.0108733	0.63985
Cinncassiol A	4	-0.342962	0.171159	0.394702
Glu Pro Asp	4	-0.306297	0.121157	0.481188
Descarboethoxyloratadine	4	-0.351356	0.219577	0.224847
SN-38	4	-0.366236	0.181209	0.427842
BUCLADESINE	4	-0.435394	0.203431	0.557327
N-Acetylphosphinothricin	4	-0.479103	0.233664	0.573453
Homoanserine	4	-0.290372	0.179299	0.194615
Kinetensin 1-3	4	-0.381371	0.258253	0.163213
b-Dihydrotetrabenazine	4	-0.274351	0.174032	0.165103
Melledonol	4	-0.308809	0.220909	0.0842915
(卤)-Conen	4	-0.275012	0.0803142	0.547587
(-)-Arctigenin	4	-0.411167	0.256845	0.26357
N-oxide gliclazide	4	-0.350923	0.147344	0.516653
Acuminoside	4	-0.452567	0.339623	0.0590955
(3a,5b,7a,12a)-24-[(carboxymethyl)amino]-1,12-dihydroxy-24-oxocholan-3-yl-b-D-Glucopyranosiduronic acid	4	-0.338005	0.263465	0.00430593
Cinncassiol C2	4	-0.282546	0.204173	0.0687945
6-Ketoestriol	4	-0.409173	0.219903	0.407181
24,25-Dihydroxyvitamin D	4	-0.456886	0.320656	0.149798
Hawkinsin	4	-0.177002	0.0885433	0.202861
6-(1-hydroxy-2-methylbut-3-en-2-yl)-2-(2-hydroxypropan-2-yl)-2H,3H,7H-furo[3,2-g]chromen-7-one	4	-0.379082	0.126727	0.689782
Psoralenol	4	-0.505424	0.333108	0.253438
(S)-a-Amino-2,5-dihydro-5-oxo-4-isoxazolepropanoic acid N2-glucoside	4	-0.407289	0.171545	0.59747
2-(2-hydroxypropan-2-yl)-6-(2-methylbut-3-en-2-yl)-2H,3H,7H-furo[3,2-g]chromen-7-one	4	-0.650861	0.443252	0.26836
Morphine	4	-0.222178	0.04111	0.538883
<i>para</i>-hydroxyatorvastatin	4	-0.37444	0.207464	0.347339
Ser Val Ile His	4	-0.435988	0.324783	0.0666695
2-(2,4-dihydroxyphenyl)-3-[5-(3,3-dimethyloxiran-2-yl)-3-methylpent-2-en-1-yl]-7-hydroxy-8-(3-methylbut-2-en-1-yl)-4H-chromen-4-one	4	-0.347416	0.210515	0.249113
10-Hydroxy-octadec-12Z-enoate-9-beta-D-glucuronide	4	-0.58	0.432378	0.0874066
Setariol	4	-0.50356	0.313257	0.328089
m-(beta-Acetyl-alpha-ethyl-p-hydroxyphenethyl)benzoic acid	4	-0.262055	0.171658	0.13568
Withaperuvin E	4	-0.228611	0.141413	0.152206
N(alpha)-Benzyloxycarbonyl-L-leucine	4	-0.275586	0.203688	0.0486572
1-oxoprevitamin D3 / 1-oxoprecholecalciferol	4	-0.460097	0.323146	0.149893
Mesobilirubinogen	4	-0.0740065	-0.0970056	0.628808
Harderoporphyrinogen	4	-0.0389996	-0.116175	0.595416
1-Hydroxyvitamin D3 3-D-glucopyranoside	4	-0.328218	0.244898	0.0485752
Atorvastatin	4	-0.386362	0.237368	0.263833
Melibiitol	5	-0.482637	0.121089	1.0416
Occidentoside	5	-0.206025	-0.106148	1.08527
6-{[3,7-dihydroxy-2-(1-hydroxy-3-methoxy-4-oxocyclohexyl)-6-methoxy-4-oxo-4H-chromen-5-yl]oxy}-3,4,5-trihydroxyoxane-2-carboxylic acid	5	-0.330607	-0.0279305	1.16353
DL-Homocystine	5	0.0455086	-0.395842	1.4621
6-(3-ethylphenoxy)-3,4,5-trihydroxyoxane-2-carboxylic acid	5	-0.332509	-0.186886	1.81474
3-O-Methylniveusin A	5	-0.0114034	-0.26281	1.10292
Annuionone B	5	-0.180615	-0.0970918	0.967796
2-Propionylpyrrole	5	0.590616	-0.678127	0.876325
Dihydroneopterin phosphate	5	-0.0771701	-0.331626	1.59114
6-(4-{5,7-dihydroxy-4-oxo-6-[3,4,5-trihydroxy-6-(hydroxymethyl)oxan-2-yl]-4H-chromen-2-yl}phenoxy)-3,4,5-trihydroxyoxane-2-carboxylic acid	5	0.621055	-0.703249	0.881599
b-D-Glucopyranosiduronic acid	5	-0.210089	-0.0387502	0.824623
Gynocardin	5	-0.0754189	-0.23061	1.17557
para-hydroxyrosiglitazone	5	-0.360086	-0.0163835	1.2103
Minoxidil	5	-0.301396	0.017836	0.884981
Furocoumarinic acid glucoside	5	-0.394488	0.0917323	0.880755
cGMP	5	-0.0741451	-0.114865	0.701737
2,8-Dihydroxyquinoline-beta-D-glucuronide	5	0.490377	-0.583453	0.810467
6-(3,4-dihydroxy-6-methyl-5-oxooxan-2-yl)-5,7-dihydroxy-2-phenyl-4H-chromen-4-one	5	-0.279847	-0.107665	1.32592
Hydroxychloroquine	5	0.573959	-0.645811	0.798071
1-(1,2,3,4,5-Pentahydroxypent-1-yl)-1,2,3,4-tetrahydro-beta-carboline-3-carboxylate	5	-0.239147	-0.00451148	0.777956
Casuarine 6-alpha-D-glucoside	5	-0.448907	0.141541	0.851451
3,4,5-trihydroxy-6-[(1-oxo-1H-isochromen-3-yl)methoxy]oxane-2-carboxylic acid	5	-0.22512	-0.2052	1.54796
6-[(6-{[3,4-dihydroxy-2,5-bis(hydroxymethyl)oxolan-2-yl]oxy}-3,4,5-trihydroxyoxan-2-yl)methoxy]-3,4,5-trihydroxyoxane-2-carboxylic acid	5	-0.483347	0.0398841	1.37345
2-(4-benzoyl-3,5-dihydroxyphenoxy)-6-(hydroxymethyl)oxane-3,4,5-triol	5	-0.415853	0.0744398	1.01881
6-Chloroindole	5	-0.662938	0.165415	1.43441
6B-Hydroxybudesonide	5	-0.114926	-0.185849	1.11939
{2-hydroxy-5-[2-hydroxy-3-(2,4,6-trihydroxyphenyl)propyl]phenyl}oxidanesulfonic acid	5	-0.0461563	-0.292143	1.33237
4-Epitetracycline	5	-0.160435	-0.182334	1.24968
Indole-3-acetic-acid-O-glucuronide	5	-0.512777	-0.0123564	1.67897
Dodecanedioic acid	5	-0.332997	-0.0883421	1.41632
3,4,5-trihydroxy-6-[(4,5,6-trihydroxy-2-{[(3-methoxy-3-oxopropanoyl)oxy]methyl}oxan-3-yl)oxy]oxane-2-carboxylic acid	5	0.448754	-0.521909	0.692883
6-[3,4-dihydroxy-4-(1-oxo-1H-isochromen-3-yl)butoxy]-3,4,5-trihydroxyoxane-2-carboxylic acid	5	-0.083571	-0.144602	0.852377
Timolol	5	0.0860553	-0.298695	0.939
{2-methoxy-5-[3-oxo-3-(2,4,6-trihydroxyphenyl)prop-1-en-1-yl]phenyl}oxidanesulfonic acid	5	-0.11088	-0.115036	0.819115
Nummularine B	5	-0.314456	0.00246894	0.988838
Genipin	5	0.496017	-0.605966	0.883922
p-Cresol glucuronide	5	0.57544	-0.645662	0.792759
Clindamycin	5	-0.113929	-0.0826203	0.697234
3,4,5-trihydroxy-6-{[7-methoxy-3-(3-methoxyphenyl)-8-methyl-4-oxo-4H-chromen-5-yl]oxy}oxane-2-carboxylic acid	5	0.514927	-0.641376	0.967579
SUCCINYLSULFATHIAZOLE	5	-0.625676	0.120247	1.49938
7-{3-[(6-carboxy-3,4,5-trihydroxyoxan-2-yl)oxy]-4,5-dihydroxyphenyl}-6,11-dihydroxy-3-methyl-2位鈦?8-dioxatricyclo[7.3.1.0鈦?鹿鲁]trideca-1,3,5(13),6,9,11-hexaen-2-ylium	5	-0.594817	0.113843	1.42735
4-Hydroxyphenytoin glucuronide	5	-0.43794	0.0385645	1.23458
3,4,5-trihydroxy-6-{[7-hydroxy-4-oxo-2-phenyl-8-(3,4,5-trihydroxyoxan-2-yl)-4H-chromen-5-yl]oxy}oxane-2-carboxylic acid	5	-0.50874	0.0688356	1.3366
6-{4-[5,7-dihydroxy-4-oxo-8-(3,4,5-trihydroxyoxan-2-yl)-4H-chromen-2-yl]phenoxy}-3,4,5-trihydroxyoxane-2-carboxylic acid	5	-0.591316	0.0873965	1.52357
Valenciachrome	5	-0.143937	-0.173562	1.16167
Pteroic acid	5	0.489712	-0.589316	0.836375
3,4,5-trihydroxy-6-{3-[2-(3-hydroxyphenyl)ethyl]-5-methoxyphenoxy}oxane-2-carboxylic acid	5	-0.192209	-0.122306	1.10697
(6-carboxy-3,4,5-trihydroxyoxan-2-yl)[4-(2H-chromen-2-ylidene)cyclohexa-2,5-dien-1-ylidene]oxidanium	5	-0.361635	-0.082849	1.48499
(6-carboxy-3,4,5-trihydroxyoxan-2-yl)[3,5,6-trihydroxy-2-(3-hydroxyphenyl)-7H-chromen-7-ylidene]oxidanium	5	-0.482855	0.109146	1.09077
4b-Hydroxystanozolol	5	0.575781	-0.671409	0.896181
7-hydroxy-6-(3-oxobut-1-en-1-yl)-2H-chromen-2-one	5	0.0825977	-0.422431	1.4522
Ile Val Gln Leu	5	-0.0588171	-0.208993	1.0351
2-Oxoticlopidine	5	-0.335326	-0.184959	1.81587
6-{[10-(but-3-enoyl)-3-hydroxy-2,2-dimethyl-8-oxo-6-propyl-2H,3H,4H,8H-pyrano[3,2-g]chromen-5-yl]oxy}-3,4,5-trihydroxyoxane-2-carboxylic acid	5	-0.130973	-0.229784	1.34869
4-Hydroxymandelic acid	5	-0.0526852	-0.29957	1.38326
Pseudoyohimbine	5	-0.358985	-0.131293	1.6732
S-Adenosyl-L-Methionine	5	-0.147945	-0.225351	1.3846
N-Monodesmethyldiltiazem	5	-0.304736	-0.0768086	1.27974
N-desmethylalmotriptan	5	-0.244913	-0.0789668	1.09847
5-Methoxytryptophol	5	-0.12339	-0.225088	1.30553
Descladinose roxithromycin	5	0.0317118	-0.313915	1.17339
4,5-Dihydroniveusin A	5	-0.398573	-0.0199044	1.34684
Ceanothine E	5	-0.26179	-0.111772	1.28523
Cysteinyl-Tryptophan	5	-0.0434367	-0.276463	1.26009
6-{3,5-dihydroxy-2-[3,4,5-trihydroxy-6-(hydroxymethyl)oxan-2-yl]phenoxy}-3,4,5-trihydroxyoxane-2-carboxylic acid	5	-0.678539	0.2009	1.33994
Dehydrogenated ticlopidine	5	-0.650605	0.167885	1.38521
6-{5-[5,7-dihydroxy-6-(3-methylbut-2-en-1-yl)-4-oxo-3,4-dihydro-2H-1-benzopyran-2-yl]-2,4-dihydroxyphenoxy}-3,4,5-trihydroxyoxane-2-carboxylic acid	5	0.650679	-0.704196	0.791344
Glu Leu His	5	-0.33328	-0.11387	1.52083
Thromboxane B3	5	-0.166735	-0.283113	1.67874
Adenosine phosphosulfate	5	0.646268	-0.70455	0.806792
Bilirubin	5	0.73667	-0.816959	0.975883
ROXITHROMYCIN	5	-0.26206	-0.0980116	1.23024
Ophthalmic acid	5	-0.408509	-0.103468	1.71757
L-Urobilin	5	-0.299179	-0.0727702	1.24569
Imidazoleacetic acid ribotide	5	-0.251423	-0.0706552	1.08542
3,4,5-trihydroxy-6-{4-[1-hydroxy-3-(5-methoxy-2,2-dimethyl-2H-chromen-6-yl)propyl]phenoxy}oxane-2-carboxylic acid	5	-0.0556396	-0.301104	1.39887
2-(4-Hydroxyphenyl)naphthalic anhydride	5	-0.573837	0.00128254	1.81757
Enkephalin L	5	-0.239026	-0.0959799	1.14882
Niaziminin A	5	-0.174705	-0.147725	1.15454
4,8,11-trihydroxy-17-methoxy-2-oxatricyclo[13.2.2.1鲁,鈦穄icosa-1(17),3,5,7(20),15,18-hexaen-10-one	5	-0.36672	-0.0626028	1.41897
3,4-dihydroxy-1-methyl-4,5-diphenylpiperidine-2,6-dione	5	-0.501246	-0.000360173	1.59365
6-[2-(2H-1,3-benzodioxol-5-yl)-1-carboxy-2-oxoethyl]-3,4,5-trihydroxyoxane-2-carboxylic acid	5	-0.517989	-0.0765418	1.95605
Thymidine glycol	5	-0.575087	0.133227	1.286
Tyr Phe Cys Phe	5	-0.546188	0.0951543	1.34873
LysoPE(16:1(9Z)/0:0)	5	-0.147081	-0.329135	1.8031
PE(17:1(9Z)/0:0)	5	-0.436519	0.0103629	1.34453
Clopidogrel	5	-0.692158	0.190648	1.42482
cis-5-dodecenoic acid	6	0.376323	-0.211816	-0.335654
Monoethylhexyl phthalic acid	6	0.227133	-0.0782378	-0.403926
Guanidineacetic acid	6	0.536175	-0.271875	-0.599654
5(d)-Aminolevulinic Acid	6	0.455166	-0.219389	-0.555362
2-Aminoheptanedioic acid	6	0.330109	-0.203865	-0.22113
1,4-Dideoxy-1,4-Imino-D-Arabinitol	6	0.490999	-0.214381	-0.689509
6-Methylnicotinamide	6	0.432587	-0.224592	-0.46252
5'-Adenylic acid	6	0.384947	-0.217995	-0.337968
Adenosine 3'-monophosphate	6	0.396968	-0.265724	-0.182432
Trigonelline	6	0.366374	-0.141567	-0.589178
N-Acetylneuraminic acid	6	0.21918	-0.0674252	-0.422552
DL-2-Aminoadipic acid	6	0.42547	-0.352765	0.0803196
N6-Carbamoyl-DL-Lysine	6	0.477715	-0.291273	-0.335221
L-alpha-glutamyl-L-hydroxyproline	6	0.371601	-0.250757	-0.162604
S-Cysteinosuccinic acid	6	0.498726	-0.248077	-0.577285
L-beta-aspartyl-L-glutamic acid	6	0.491242	-0.32026	-0.26054
Deoxyadenosine	6	0.437628	-0.301745	-0.165383
Asp Gly Glu	6	0.279863	-0.173423	-0.185083
H-Gly-Phe-OH	6	0.272591	-0.235965	0.0918626
N蠅-Acetylhistamine	6	0.277935	-0.0991283	-0.480507
Guanine	6	0.415412	-0.184072	-0.572428
2-Aminomethylpyrimidine (hydrochloride)	6	0.378845	-0.19621	-0.407009
N-(6-Amino-3-methyl-2,4-dioxo-1,2,3,4-tetrahydropyrimidin-5-yl)acetamide	6	0.432735	-0.263118	-0.306621
4-Hydroxyproline galactoside	6	0.226949	-0.102693	-0.304085
Hypoxanthine	6	0.430966	-0.361514	0.0983696
(3,4,5,6-tetrahydroxyoxan-2-yl)methyl 4-hydroxybenzoate	6	0.306434	-0.287288	0.192674
Hydroxytinidazole	6	0.32579	-0.215679	-0.159458
4-Pyridoxic acid	6	0.225626	-0.0739535	-0.416531
Oleic Acid	6	0.358774	-0.185479	-0.386807
Carvone	6	0.149878	-0.0225905	-0.384392
5-Acetylamino-6-amino-3-methyluracil	6	0.44355	-0.299667	-0.192631
N-(1-Deoxy-b-D-fructopyranosyl) (R)C(S)S-alliin	6	0.399245	-0.197332	-0.467254
3-Phenylpropanal	6	0.334164	-0.162302	-0.402707
4-Aminohippuric Acid	6	0.33795	-0.147107	-0.476405
3,4,5-trihydroxy-6-{[(2E)-3-phenylprop-2-enoyl]oxy}oxane-2-carboxylic acid	6	0.402772	-0.284668	-0.123976
3,4,5-trihydroxy-6-{[3,4,5-trihydroxy-5-(hydroxymethyl)oxolan-2-yl]methoxy}oxane-2-carboxylic acid	6	0.478796	-0.33837	-0.147497
1,3-Dimethyluric acid	6	0.191349	-0.21495	0.264631
Cimetidine	6	0.112007	0.0104567	-0.398229
Piperonal	6	0.231619	-0.181775	0.0020612
Glutaminylisoleucine	6	0.317019	-0.169996	-0.317017
(卤)-Desethylhydroxychloroquine	6	0.175182	-0.034455	-0.416615
Caffeine	6	0.428114	-0.314681	-0.0826578
3,4,5-trihydroxy-6-{[4-hydroxy-5-(3-hydroxyphenyl)pentanoyl]oxy}oxane-2-carboxylic acid	6	0.845424	-0.502191	-0.64716
N17-Dimethylindole-3-carboxaldehyde	6	0.377876	-0.16344	-0.536939
Metronidazole	6	0.303521	-0.116764	-0.490202
3-hydroxy-6-methyl-2H-chromen-2-one	6	0.279198	-0.192464	-0.105687
Theophylline	6	0.393747	-0.274171	-0.137914
Vanillin acetate	6	0.358607	-0.264071	-0.0672867
(5,7-dihydroxy-4-oxo-2-phenyl-3,4-dihydro-2H-1-benzopyran-3-yl)oxidanesulfonic acid	6	0.740651	-0.430513	-0.605281
3,4,5-trihydroxy-6-{[3-(4-hydroxy-3-methoxyphenyl)propanoyl]oxy}oxane-2-carboxylic acid	6	0.283232	-0.208622	-0.0529179
3,4,5-Trimethoxycinnamic acid	6	0.324777	-0.209047	-0.18316
3-(4-hydroxyphenyl)-7-{[3,4,5-trihydroxy-6-(hydroxymethyl)oxan-2-yl]oxy}-4H-chromen-4-one	6	0.684828	-0.661089	0.507909
Acremoauxin A	6	0.525594	-0.341028	-0.28536
3,4,5-trihydroxy-6-{[3-(3-hydroxyphenyl)propanoyl]oxy}oxane-2-carboxylic acid	6	0.260211	-0.19143	-0.0495733
Pilocarpic acid	6	0.497466	-0.230947	-0.642811
5-(3',5'-Dihydroxyphenyl)-gamma-valerolactone 3-O-glucuronide	6	0.785896	-0.47456	-0.57022
Benzylmalic acid	6	0.346655	-0.127497	-0.583651
Cinnamic acid	6	0.375661	-0.202934	-0.369602
4-Hydroxy-5-(3',4'-dihydroxyphenyl)-valeric acid-O-glucuronide	6	0.324513	-0.229609	-0.0988639
Oxindole	6	0.445006	-0.237152	-0.450988
N2-Acetylphenelzine	6	0.349944	-0.171574	-0.415199
5-Methoxynoracronycine	6	0.1229	-0.00409511	-0.373767
Hydroxylated N-acetyl desmethyl frovatriptan	6	0.265567	-0.149866	-0.235286
10-Hydroxy-2-decenoic acid	6	0.256991	-0.225508	0.0989745
Ser Met Phe Gly	6	0.520065	-0.559113	0.61737
2-[2-hydroxy-3-(4-hydroxy-3-methoxyphenyl)propyl]benzene-1,3,5-triol	6	0.414156	-0.260153	-0.259638
Glycitein	6	0.242111	-0.239766	0.20411
3,4,5-trihydroxy-6-{[3,5,7-trihydroxy-2-(3-methoxyphenyl)-8aH-chromen-6-yl]oxy}oxane-2-carboxylic acid	6	0.288954	-0.208708	-0.0707445
Undecylenic acid	6	0.705969	-0.391892	-0.651868
{[3-(2-hydroxyphenyl)oxiran-2-yl]methoxy}sulfonic acid	6	0.950605	-0.595306	-0.603325
3-Hydroxybenzaldehyde	6	0.316976	-0.155061	-0.377497
D-Erythroascorbic acid 1'-a-D-glucoside	6	0.302473	-0.149451	-0.354202
5-(Hydroxyphenyl)-gamma-valerolactone-O-sulphate	6	0.844618	-0.495581	-0.671427
(R)-Shinanolone	6	0.401738	-0.175393	-0.56422
6-(hydroxymethyl)-7-methoxy-2H-chromen-2-one	6	0.798808	-0.427172	-0.803575
Moringyne	6	0.436757	-0.193605	-0.601537
3,4,5-trihydroxy-6-{[3-hydroxy-2-(3-hydroxyphenyl)-3,4-dihydro-2H-1-benzopyran-7-yl]oxy}oxane-2-carboxylic acid	6	0.717497	-0.437433	-0.503647
Hydrocinnamic acid	6	0.314664	-0.111527	-0.546854
3,4,5-trihydroxy-6-[3-hydroxy-2-(4-hydroxy-3-methylbut-2-en-1-yl)phenoxy]oxane-2-carboxylic acid	6	0.376443	-0.239136	-0.225149
(-)-Fumigaclavine B	6	0.187761	-0.0514559	-0.387567
Lactucin	6	0.129637	0.00512957	-0.432607
6-{3,5-dihydroxy-4-[2-hydroxy-3-(3-methoxyphenyl)propyl]phenoxy}-3,4,5-trihydroxyoxane-2-carboxylic acid	6	0.229643	-0.071333	-0.439925
7-hydroxy-2-(4-hydroxyphenyl)-5-methoxy-6,8-dimethyl-3,4-dihydro-2H-1-benzopyran-4-one	6	0.389388	-0.183009	-0.494077
Normeperidine	6	0.157105	-0.0907619	-0.130654
Ile Leu Ile	6	0.717909	-0.374346	-0.761013
3,4,5-trihydroxy-6-{4-[3-(5-hydroxy-2,2-dimethyl-2H-chromen-6-yl)prop-2-enoyl]phenoxy}oxane-2-carboxylic acid	6	0.236073	-0.108059	-0.311288
5,7,8-trihydroxy-2-phenyl-3,4-dihydro-2H-1-benzopyran-4-one	6	0.199625	-0.160449	0.0171326
[2-hydroxy-5-(3,5,7-trihydroxy-3,4-dihydro-2H-1-benzopyran-2-yl)phenyl]oxidanesulfonic acid	6	0.74837	-0.389529	-0.796146
Gibberellin A38 glucosyl ester	6	0.154648	-0.0430466	-0.316517
6-(2,4-dihydroxyphenyl)-2-{4-[(E)-2-(2,4-dihydroxyphenyl)ethenyl]-2,6-dihydroxyphenyl}-4-methylcyclohex-3-ene-1-carboxylic acid	6	0.31967	-0.110188	-0.56819
6-({8,14-dihydroxy-17-methoxy-10-oxo-2-oxatricyclo[13.2.2.1鲁,鈦穄icosa-1(17),3,5,7(20),15,18-hexaen-4-yl}oxy)-3,4,5-trihydroxyoxane-2-carboxylic acid	6	0.806613	-0.451767	-0.728539
Rosoxacin	6	0.280775	-0.172703	-0.190904
Dendrobane A	6	0.497726	-0.227419	-0.657959
6-[3,5-dihydroxy-2-(3-methylbut-2-en-1-yl)-4-[3-(2,4,5-trihydroxyphenyl)propanoyl]phenoxy]-3,4,5-trihydroxyoxane-2-carboxylic acid	6	0.850279	-0.480632	-0.750085
6-{[3,4-dihydroxy-5-(hydroxymethyl)-5-{[3,4,5-trihydroxy-6-(hydroxymethyl)oxan-2-yl]oxy}oxolan-2-yl]methoxy}-3,4,5-trihydroxyoxane-2-carboxylic acid	6	0.770725	-0.464533	-0.562727
Isohelenol	6	0.314547	-0.171478	-0.303151
14-Dihydroxycornestin	6	0.231404	-0.0583163	-0.498353
Dioscoretine	6	0.799165	-0.415469	-0.852207
ACRL Toxin II	6	0.43372	-0.225984	-0.460469
6-({8,8-dimethyl-2-oxo-4-phenyl-2H,8H-pyrano[2,3-f]chromen-5-yl}oxy)-3,4,5-trihydroxyoxane-2-carboxylic acid	6	0.86587	-0.543324	-0.545157
(卤)-Enterolactone	6	0.307636	-0.177751	-0.255735
Cucurbic acid	6	0.302296	-0.121308	-0.467867
3-bromohexadecanoic acid	6	0.35554	-0.173519	-0.42508
Mycophenolic acid O-acyl-glucuronide	6	0.796508	-0.484767	-0.562501
Fluoxetine glucuronide	6	0.604697	-0.630521	0.63837
6-[4-(2-carboxy-2-hydroxyethyl)-2-(3-methylbut-2-en-1-yl)phenoxy]-3,4,5-trihydroxyoxane-2-carboxylic acid	6	0.217217	-0.0593814	-0.448964
Marminal	6	0.605719	-0.371594	-0.415815
5-O-Methylvisamminol	6	0.512322	-0.310909	-0.365451
Neryl glucoside	6	0.379377	-0.205877	-0.369463
4,8,9-trihydroxy-17-methoxy-2-oxatricyclo[13.2.2.1鲁,鈦穄icosa-1(17),3,5,7(20),15,18-hexaen-10-one	6	0.67651	-0.665803	0.553463
20-HETE ethanolamide	6	0.493312	-0.228388	-0.640003
Unknown 370	6	0.762351	-0.485179	-0.45233
2,3-Dihydro-4-(4-methoxyphenyl)-1H-phenalene-1,2,3-triol	6	0.615673	-0.628919	0.597001
16a-Hydroxydydrogesterone	6	0.396742	-0.21049	-0.405897
Tetrahydrocortisone	6	0.432397	-0.249694	-0.360034
Anastatin A	6	0.398012	-0.22991	-0.331111
(+)-Prosopinine	6	0.470168	-0.217969	-0.608776
Persicachrome	6	0.213577	-0.148291	-0.0765321
Zeranol	6	0.344757	-0.152834	-0.474784
Lacto-N-triaose	6	0.535291	-0.54621	0.516636
2,6 Dimethylheptanoyl carnitine	6	0.442359	-0.185722	-0.651326
S-(3-Methylbutanoyl)-dihydrolipoamide-E	6	0.316331	-0.131342	-0.471721
6-{[5,7-dihydroxy-2-(3-hydroxy-2,2-dimethyl-3,4-dihydro-2H-1-benzopyran-6-yl)-4-oxo-4H-chromen-3-yl]oxy}-3,4,5-trihydroxyoxane-2-carboxylic acid	6	0.557617	-0.324837	-0.452799
Asteltoxin	6	0.27536	-0.325957	0.448326
Coriandrone B	6	0.451564	-0.258758	-0.384126
(+-)-Decanoylcarnitine	6	0.266461	-0.0933672	-0.467445
Norhydromorphone	6	0.284496	-0.197102	-0.10369
Losartan N2-glucuronide	6	0.850136	-0.509321	-0.633188
All-trans-13,14-dihydroretinol	6	0.301642	-0.110476	-0.509755
rac-4-Hydroxy-4-O-(beta-D-glucuronide)-all-trans-retinyl acetate	6	0.396336	-0.182495	-0.518234
hydroxychlorpromazine	6	0.572572	-0.594221	0.593082
N-Butylscopolamine metabolite	6	0.29413	-0.142831	-0.35457
2-(diethylamino)-4'-hydroxy-Propiophenone	6	0.290267	-0.206239	-0.0849371
Acetylsalvipisone	6	0.535122	-0.240473	-0.723762
Lucidone C	6	0.276995	-0.135794	-0.328704
3-hydroxy-6-[(E)-2-methoxyethenyl]-7-methyl-2H-chromen-2-one	6	0.591343	-0.289371	-0.70388
4a-Hydroxytetrahydrobiopterin	6	0.268367	-0.0799145	-0.528101
Androsterone glucuronide	6	0.356094	-0.256674	-0.0893254
Saphenic acid	6	0.585023	-0.28255	-0.711488
Asn Gly Ser Thr	6	0.319482	-0.169907	-0.325203
5(S),14(R)-Lipoxin B4	6	0.434914	-0.23654	-0.421416
3,4,5-trihydroxy-6-{[1-(4-methoxyphenyl)pentan-3-yl]oxy}oxane-2-carboxylic acid	6	0.323183	-0.172781	-0.325295
Amprotropine	6	0.505638	-0.272308	-0.500895
MG(15:0/0:0/0:0)	6	1.15697	-0.766143	-0.565449
Solacaproine	6	1.09439	-0.764892	-0.371751
1-Acetoxy-2-hydroxy-16-heptadecen-4-one	6	0.361459	-0.175092	-0.437495
10,20-Dihydroxyeicosanoic acid	6	0.817677	-0.551058	-0.360681
D-erythro-Sphingosine C-17	6	0.352941	-0.351951	0.307398
C16 Sphingosine	6	1.04489	-0.642723	-0.710367
N-Undecanoylglycine	6	0.32119	-0.120106	-0.532761
9,10-epoxy-12-octadecenoic acid	6	0.376954	-0.161033	-0.543777
4-Androstenediol	6	0.372533	-0.209839	-0.331641
16-phenyl-tetranor-PGE2	6	0.341463	-0.1954	-0.29155
Triphenylphosphine oxide	6	0.750312	-0.454317	-0.539352
Ascorbalamic acid	6	0.896214	-0.490188	-0.857212
Sphinganine	6	0.472154	-0.277149	-0.374884
p-Tolualdehyde	6	1.2041	-0.725948	-0.878305
Hydrocortisone acetate	6	0.766619	-0.412492	-0.760909
1'-O-Acetylpaxilline	6	1.21762	-0.735116	-0.884016
15(S)-HpEPE	6	0.414883	-0.237208	-0.355078
17-beta-Estradiol-3-glucuronide	6	0.351397	-0.203747	-0.289232
2,5-Dimethylbenzaldehyde	6	0.413904	-0.197643	-0.512557
Cincassiol B	6	0.323919	-0.160158	-0.378866
